# Supplementary material
Source: Research Square preprint supplement (doi:10.21203/rs.3.rs-9255760/v1)

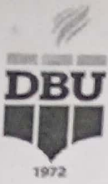

(Established Under Govt. of Punjab Ordinance 7 of 2012)

# DESH BHAGAT UNIVERSITY

Amlah Road, Mandi Gobindgarh (Punjab)

Ref. No. 5248

Date: 26/3/25

## TO WHOM IT MAY CONCERN

This is to certify that Mr./Ms. **ERIC KWASI ELLIASON**, S/D/o Joseph Elliason bearing Roll No. **2338076002** is a bonafide research scholar of Ph.D. in the Department of **Public Health** at Desh Bhagat University. The proposed topic of his/her research work is "**A CROSS SECTIONAL STUDY ON CANCER AWARENESS, RISK PERCEPTION, STIGMA AND HEALTH BEHAVIOUR AMONG TERTIARY STUDENTS IN PUNJAB**"

He/She may be allowed to visit your premises for research work. It is ensured that the data/observations that he/she will get from you will solely be used for research and not for any commercial purposes.

  
Director Research  
Desh Bhagat University, Mandi Gobindgarh

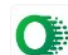

Supplement: Supplementary file 1 [file 0d74e48c63f2da76391eb69d.pdf]
